# Supplementary material for: Fish female-biased gene cyp19a1a leads to female antiviral response attenuation between sexes by autophagic degradation of MITA
Source: PubMed Central journal article supplement (PMC9249237; doi:10.1371/journal.ppat.1010626), 2022-06-21
Supplement: ppat.1010626.s001.pdf [file ppat.1010626.s001.pdf]

Table S1. Primers used in this study.

| Name                    | Sequence (5'→3')                                    | Purpose                  |
|-------------------------|-----------------------------------------------------|--------------------------|
| pCMV-HA/Myc-Cyp19a1a-F  | CGGGGTACCATGGCAGGTGATCTGCTCCAGCCCTGT<br>GG          | Eukaryotic<br>expression |
| pCMV-HA/Myc-Cyp19a1a-R  | AAGGAAAAAAGCGGCCGCTCAGAGAGTGTCTTCTGA<br>GGATAAGCTGC |                          |
| pCMV-Tag2c-cyp19a1a-F   | GATATCAAATGGCAGGTGATCTGCTCCAGCCCTGTG<br>G           |                          |
| pCMV-Tag2c-Cyp19a1a-R   | ACGCGTCGACTCAGAGAGTGTCTTCTGAGGATAAGCT<br>GC         |                          |
| mCherry-Cyp19a1a-F      | CGCGGATCCGCCACCATGGCAGGTGATCTGCTCC                  |                          |
| mCherry-Cyp19a1a-R      | CCCATCGATGAGAGTGTCTTCTGAGGATAAG                     |                          |
| EGFP-Cyp19a1a-F         | CTAGCTAGCATGGCAGGTGATCTGCTCCAGCCCTGT<br>GG          |                          |
| EGFP-Cyp19a1a-R         | CGGGGTACCGAGAGTGTCTTCTGAGGATAAGCTGC                 |                          |
| pCMV-Myc/Tag2C- ATG14-F | CGGAATTCCG ATGGCTTGTCCCTCAACAGGC                    |                          |
| pCMV-Myc/Tag2C-ATG14-R  | CCCTCGAGTCAGCGCTGGCCTGTGTAGGC                       |                          |
| DsRed-MAVS-F            | CGCGGATCCGCCACCATGTCACTGACACGTGAGC                  |                          |
| DsRed-MAVS-R            | CCCATCGATATGATTGAGCTTCCAG                           |                          |
| DsRed-TBK1-F            | CGCGGATCCGCCACCATGCAGAGTACGGCCAAT                   |                          |
| DsRed-TBK1-R            | CCGGAATTCCGCATCCGCTCCACTG                           |                          |
| DsRed-MITA-F            | CGCGGATCCGCCACCATGTCTGTGATGGGAG                     |                          |
| DsRed-MITA-R            | CCGGAATTCCGGTTTTGTTTCATTGC                          |                          |
| pCMV-Myc/Tag2C-MAVS-F   | CCGCTCGAGCGATGTCACTGACACGTGAGC                      |                          |
| pCMV-Myc/Tag2C-MAVS-R   | ATTTGCGGCCGCTTAATGATTGAGCTTCCAG                     |                          |
| pCMV-Myc/Tag2C-TBK1-F   | CGCGGATCCCGATGCAGAGTACGGCCAAT                       |                          |
| pCMV-Myc/Tag2C-TBK1-R   | AACTCGAGTCACATCCGCTCCACTG                           |                          |
| pCMV-Myc/Tag2C-MITA-F   | CCGGAATTCCGATGTCTGTGATGGGAGAA                       |                          |

|                                        |                                |      |
|----------------------------------------|--------------------------------|------|
| pCMV-Myc/Tag2C-MITA-R                  | AACTCGAGTTAGTTTTGTTTCATTGC     |      |
| pEGFP-N3-MITA-F                        | CTAGCTAGCATGTCTGTGATGGGAG      |      |
| pEGFP-N3-MITA-R                        | CGCGGATCCGTTTTGTTTCATTGC       |      |
| pEGFP-N3-MITA-C-F                      | CTAGCTAGCATGGTGGCTCATGGTCTGG   |      |
| pEGFP-N3-MITA-N-R                      | CGCGGATCCGTTTCATCTTTTTTGCTTC   |      |
| pCMV-HA-MITA-N-R                       | CCGCTCGAGTTAGTTCATCTTTTTTGCTTC |      |
| pCMV-HA-MITA-C-F                       | CCGGAATCCGATGGTGGCTCATGGTCTGG  |      |
| <i>Dr ifn<math>\phi</math>1</i> -F     | GAATGGCTTGCCGATACAGGATA        |      |
| <i>Dr ifn<math>\phi</math>1</i> -R     | TCCTCCACCTTTGACTTGTCATC        |      |
| <i>Dr cyp19a1a</i> -F                  | CTAGGAGTCCCGCTCAATGAGCAC       | qPCR |
| <i>Dr cyp19a1a</i> -R                  | GGCATCCTGCAACTCCTGAGCATC       |      |
| <i>Dr <math>\beta</math>-actin</i> -F  | TCCAGCCTTCCTCCTGGGTATG         |      |
| <i>Dr <math>\beta</math>-actin</i> -R  | TCAGGGGGAGCAATGATCTTGA         |      |
| <i>epc ifn</i> -F                      | ATGAAAACCTCAAATGTGGACGTA       |      |
| <i>epc ifn</i> -R                      | GATAGTTTCCACCCTTTCCTTAA        |      |
| <i>epc vig1</i> -F                     | AGCGAGGCTTACGACTTCTG           |      |
| <i>epc vig1</i> -R                     | GCACCAACTCTCCAGAAAA            |      |
| <i>epc irf7</i> -F                     | GGAGGACCAACACAAAGTCTATC        |      |
| <i>epc irf7</i> -R                     | CATTTCCTCCACTTGGCTGAG          |      |
| <i>epc rig-i</i> -F                    | TGCTGGACCGGATGTGTTATCT         |      |
| <i>epc rig-i</i> -R                    | TGGTGATCGATGGTTCGATTCT         |      |
| <i>epc cyp19a1a</i> -F                 | CTAGGAGTCCCTCTCAATGAGCGT       |      |
| <i>epc cyp19a1a</i> -R                 | GGCATCCTGTAACTCCTGAGCTTC       |      |
| <i>epc atg14</i> -F                    | TGGAAGAAACCCGGAGAGGTATTC       |      |
| <i>epc atg14</i> -R                    | CGCAACAACAGCTCCTTGCCACTC       |      |
| <i>epc <math>\beta</math>-actin</i> -F | CACTGTGCCCATCTACGAG            |      |
| <i>epc <math>\beta</math>-actin</i> -R | CCATCTCCTGCTCGAAGT             |      |
| <i>caIFN-A</i> -F                      | GCTTCGGGAAATGAGTGGACAAT        |      |
| <i>caIFN-A</i> -R                      | TTCACTTTTGTTAGATTCCATTGCG      |      |

|                                     |                            |  |
|-------------------------------------|----------------------------|--|
| <i>caIFN-B-F</i>                    | GGACACCTGTACAACCTTGATTGGAG |  |
| <i>caIFN-B-R</i>                    | GCTCTGGATTCATGTGTTCTTTGG   |  |
| <i>ca<math>\beta</math>-actin-F</i> | AGACCAGCAAATACTATGTCACCA   |  |
| <i>ca<math>\beta</math>-actin-R</i> | GGCACAGTTCCAATACCTCCAA     |  |
| <i>SVCV-g-F</i>                     | CGACCTGGATTAGACTTG         |  |
| <i>SVCV-g-R</i>                     | AATGTTCCGTTTCTCACT         |  |
| <i>SVCV-l-F</i>                     | GCCCACTTTGCATCCAGTCC       |  |
| <i>SVCV-l-R</i>                     | GAGATGCCACAGACTCCTCC       |  |
| <i>SVCV-m-F</i>                     | TACTCCTCCCCTTACGA          |  |
| <i>SVCV-m-R</i>                     | CAAGAGTCCGAGAAGGTC         |  |
| <i>SVCV-n-F</i>                     | TGAGTGCTGAGGACGAT          |  |
| <i>SVCV-n-R</i>                     | TTGTGAGTTGCCGTTA           |  |
| <i>SVCV-p-F</i>                     | TTGGACCTGGGATAGTGA         |  |
| <i>SVCV-p-R</i>                     | CTTGCTTGTTTGTGGG           |  |
